# Supplementary material
Source: MDPI journal article supplement (https://www.mdpi.com/2673-4931/29/1/47)
Supplement: s1 [file s1 › environsciproc-2917712-supplementary.pdf]

## Supplementary Materials

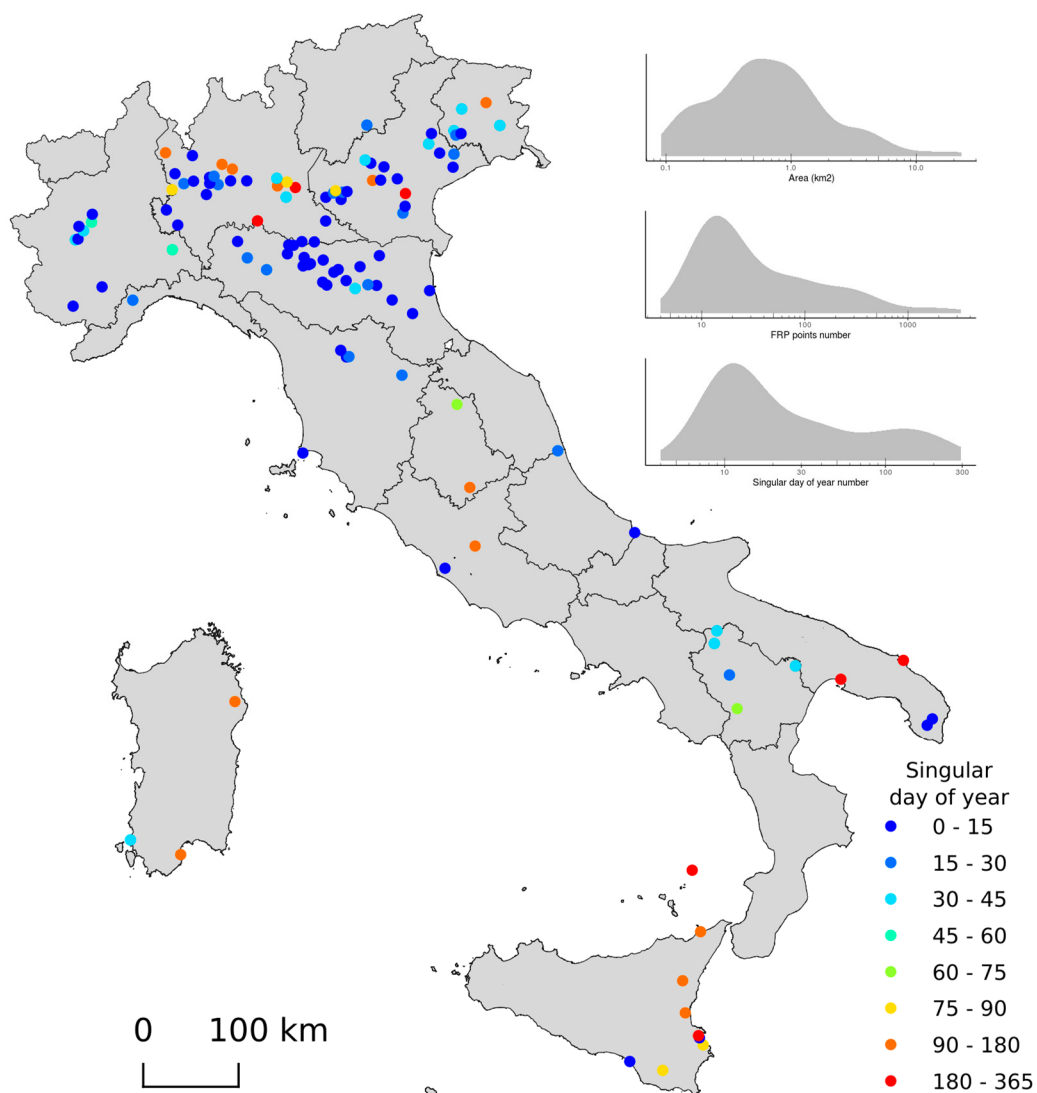

**Figure S1.** Distribution map of identified thermal anomalies hotspots.

**Disclaimer/Publisher's Note:** The statements, opinions and data contained in all publications are solely those of the individual author(s) and contributor(s) and not of MDPI and/or the editor(s). MDPI and/or the editor(s) disclaim responsibility for any injury to people or property resulting from any ideas, methods, instructions or products referred to in the content.
